# Supplementary material for: Characterization of the human TARDBP gene promoter
Source: PubMed Central journal article supplement (PMC8129075; doi:10.1038/s41598-021-89973-z), 2021-05-17

# Supplementary Figure 1

Uncropped images for western blots shown in Figure 7A

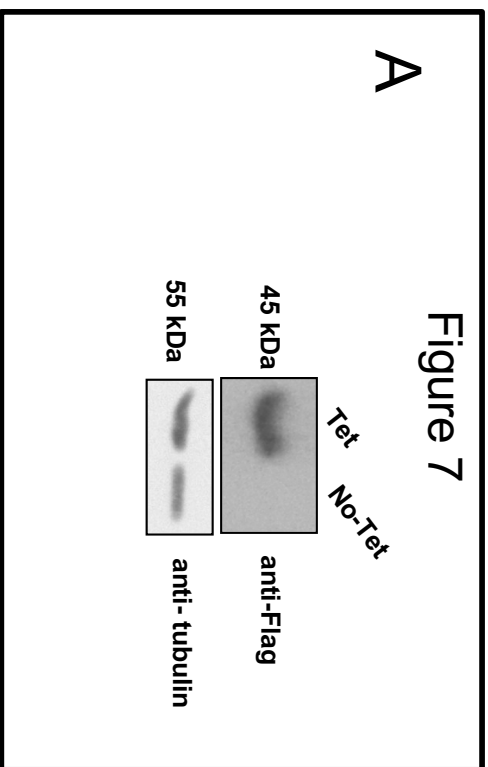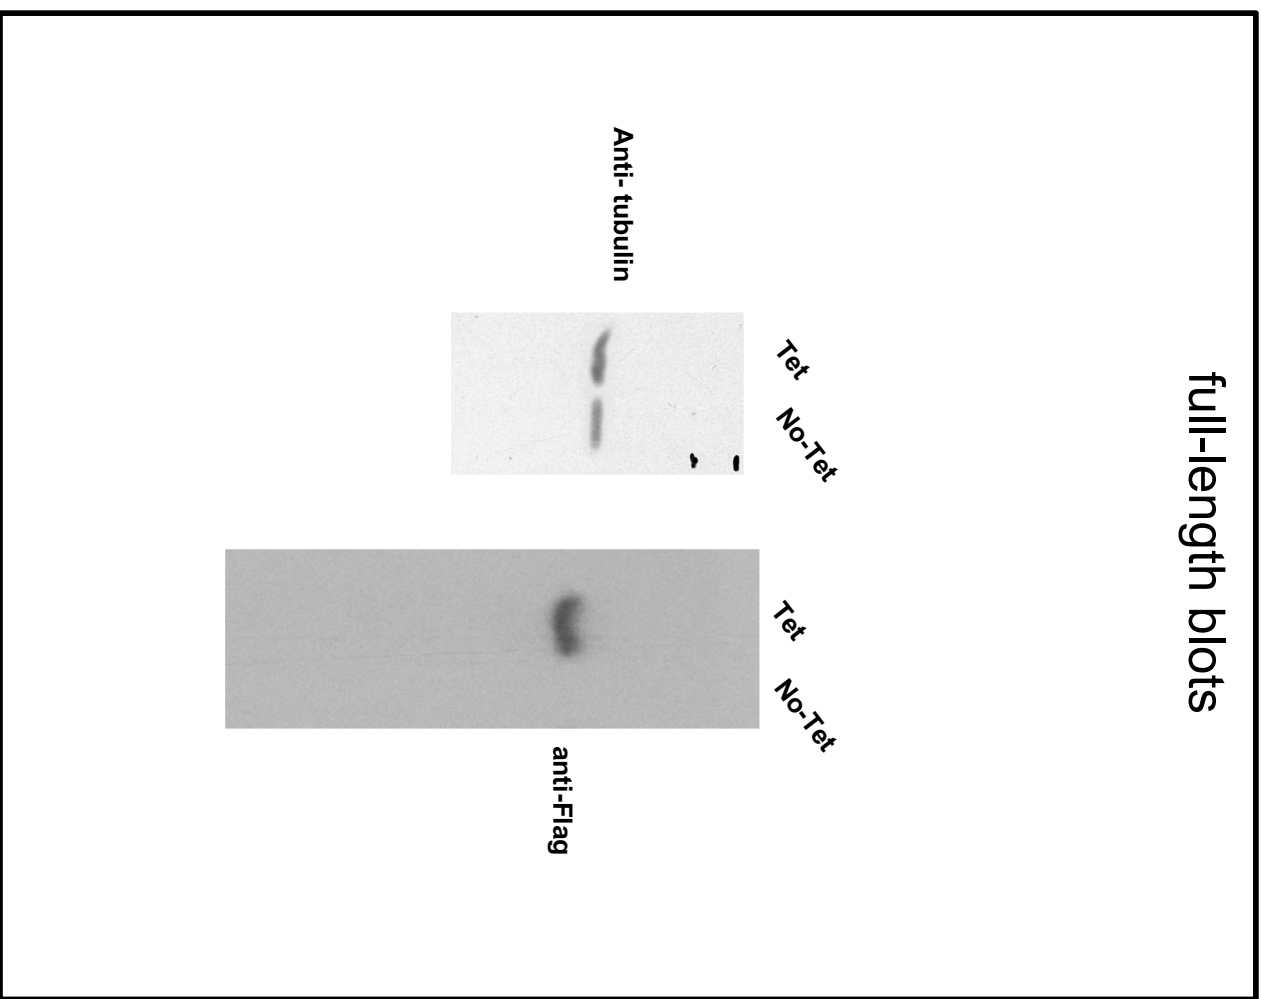

# Supplementary Figure 2

Uncropped images for agarose gel shown in Figure 8B

## Figure 8B

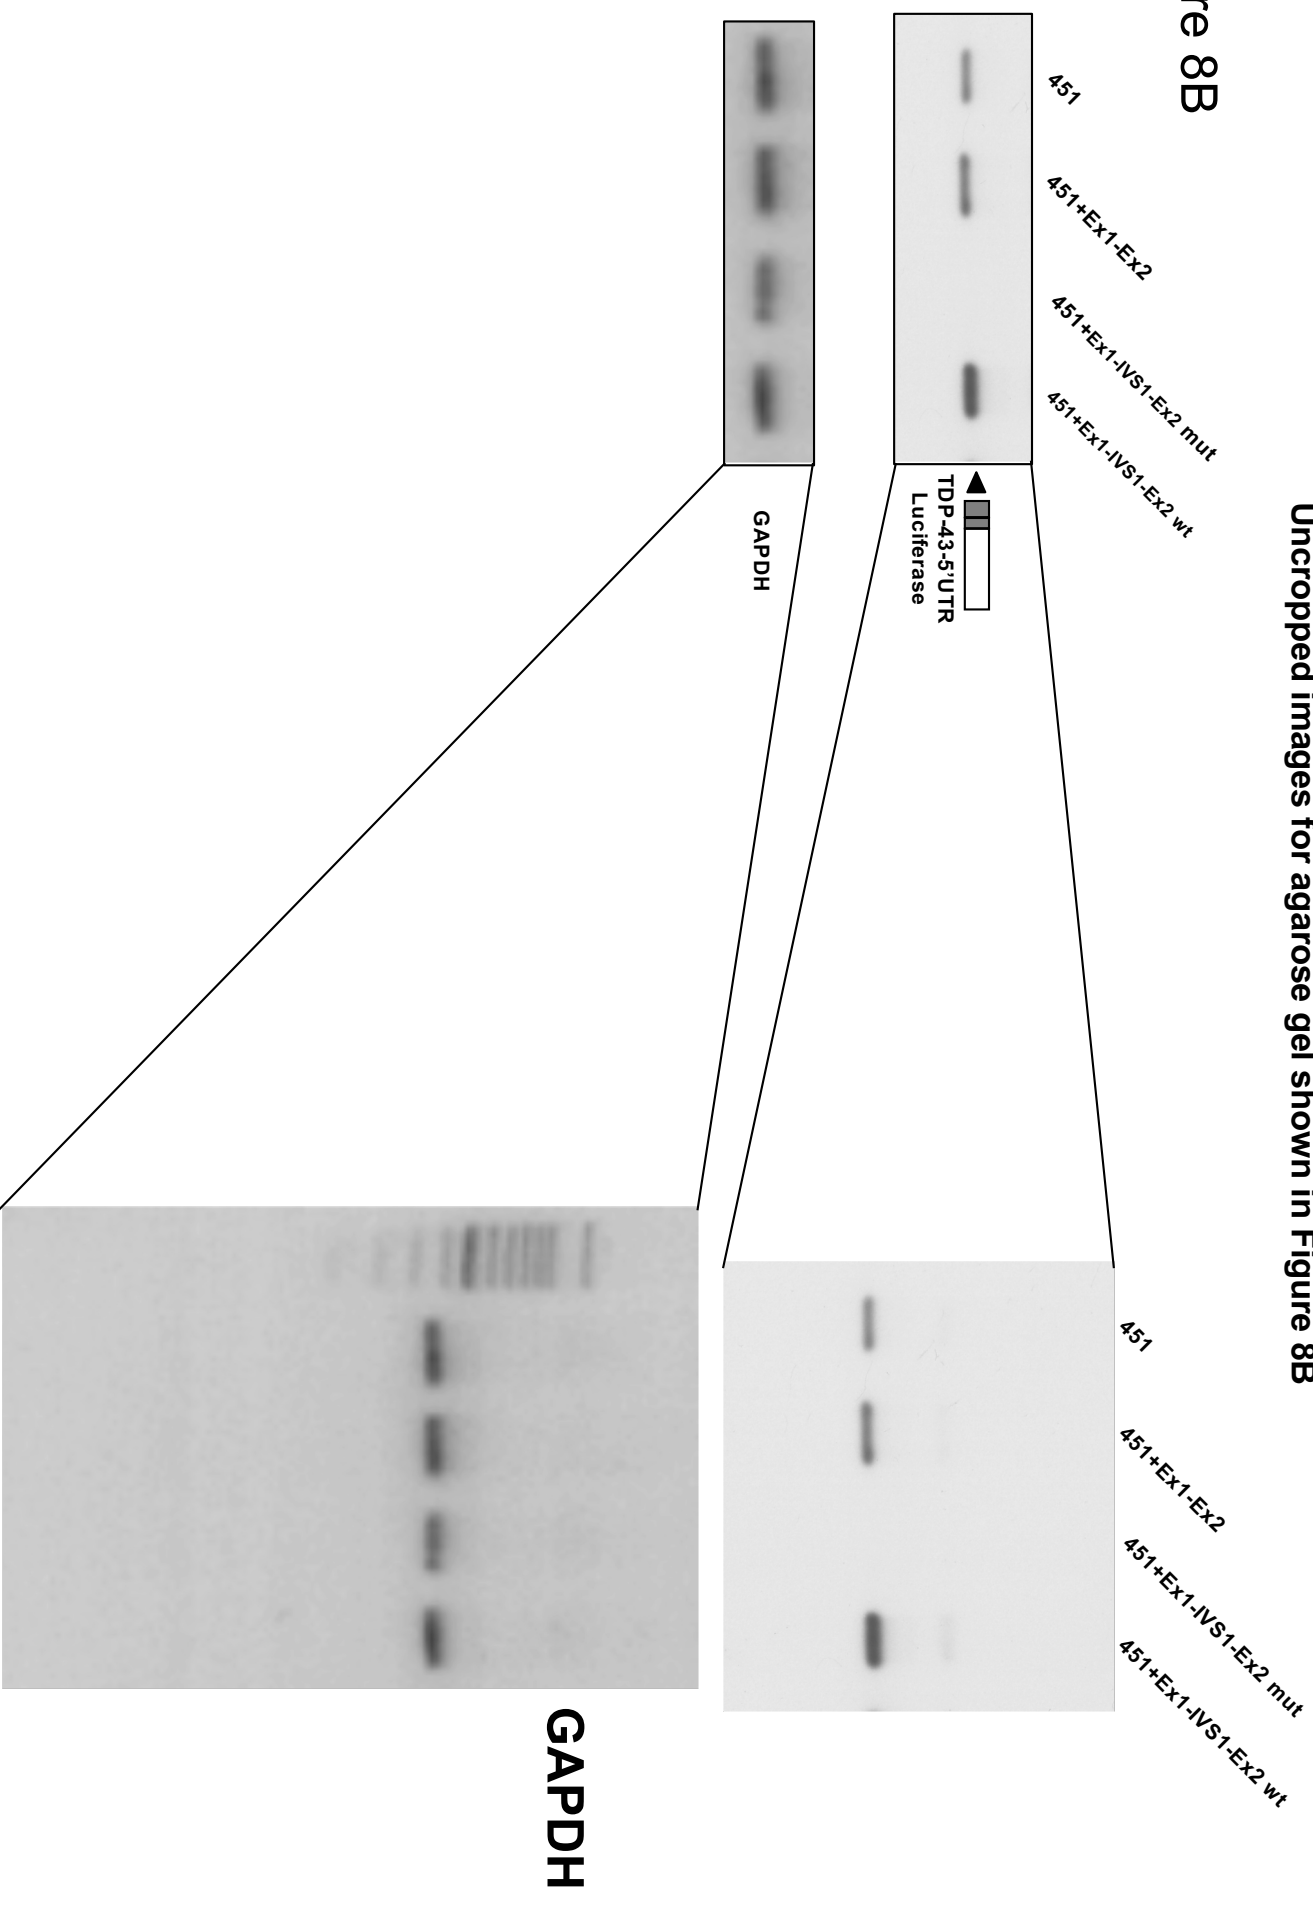

Supplement: 41598_2021_89973_MOESM1_ESM.pdf [file 41598_2021_89973_MOESM1_ESM.pdf]
